# Supplementary material for: Ultrasensitive detection of Staphylococcal enterotoxin B in milk based on target-triggered assembly of the flower like nucleic acid nanostructure
Source: Royal Society of Chemistry journal article supplement (doi:10.1039/c9ra08869e), 2019-01-01
Supplement: c9ra08869e1.pdf [file c9ra08869e1.pdf]

1 **Electronic Supporting Information**

2

3 **Ultrasensitive detection of *Staphylococcal* enterotoxin B in milk based on target-triggered**  
4 **assembly of the flower like nucleic acid nanostructure**

5

6 Xiaohui Xiong<sup>a,#</sup>, Yun Luo<sup>a,#</sup>, Yichen Lu<sup>a</sup>, Xiong Xiong<sup>a</sup>, Yi Li<sup>a</sup>, Yuanjian Liu<sup>\*a</sup>, Lixia Lu<sup>\*a</sup>

7

8 <sup>a</sup>*Coll Food Sci & Light Ind, Nanjing Tech University, Nanjing 211816, China*

9 <sup>\*</sup>*Corresponding author. Tel.: 86-25-58139432; Fax: 86-25-58139527*

10 <sup>#</sup>*These authors contributed equally to this work.*

11 *E-mail address: lucias\_cumt@163.com; llxhn66@126.com*

**Table S1**

The sequences for oligonucleotides employed for this work.

| Aauxiliary oligos | Sequence (5' to 3')                                                                 |
|-------------------|-------------------------------------------------------------------------------------|
| CpDNA             | GATGGCTCTAACTCTCCTCTTTTTT-SH                                                        |
| Trigger DNA       | AGAGGAGAGTTAGAGCCATCATCATCAGCCGAGAG                                                 |
| MB1               | CGAGAGGGGTAGGGCGCCCTCTCGGCTGATGAT                                                   |
| MB2               | GGGTAGGGCATCATCTAAGCCCTACCCCTCTCG                                                   |
| MB3               | GGCATCATCAGCCGAGAGGATGATGATGCCCTACC<br>C                                            |
| SEB Aptamer       | GGTATTGAGGGTCGCATCCACTGGTCGTTGTCTGTT<br>GTCTGTTATGTTGTTTCGTGATGGCTCTAACTCTCCT<br>CT |
